# Supplementary material for: Distinct Profiles of Cell-Free MicroRNAs in Plasma of Veterans with Post-Traumatic Stress Disorder
Source: PubMed Central journal article supplement (PMC6678393; doi:10.3390/jcm8070963), 2019-07-03

## List of supplementary material

Table S1. The list of detected novel miRNAs. The novel miRNAs that had significantly higher or lower abundance in PTSD+ patients were marked with + and -, respectively.

Table S2. The list of detected piRNAs. The piRNAs that had significantly higher or lower abundance in PTSD+ patients were marked with + and -, respectively.

Table S3. The list of detected snoRNAs.

Table S4. The list of GOBPs and KEGG pathways of the target genes of miR-203a-3p and miR-339-5p. Count indicates the number of genes of the involved in the pathway targeted by the miRNA. FES indicates Fold Enrichment Score. % FES in the last column indicates the percentage of miRNAs not altered in PTSD that showed higher FES than miR-203a-3p or miR-339-5p.

Figure S1. The read length distribution in each sample type.

Figure S2. The distribution of mapped read length in A. plasma, B. EV, C. EVD.

Figure S3. The number of the detected novel miRNAs in each sample type.

Figure S4. The number of the detected piRNAs in each sample type.

Figure S5. The number of the detected snoRNAs in each sample type.

**Table S1. The list of detected novel miRNAs.** The novel miRNAs that had significantly higher or lower abundance in PTSD+ patients were marked with + and -, respectively.

| No. | Plasma              |   | EV                  |   | EVD                 |   |
|-----|---------------------|---|---------------------|---|---------------------|---|
|     |                     |   |                     |   |                     |   |
| 1   | novel:chr6_12380-5p | + | novel:chr1_658-5p   | + | novel:chr12_3019-3p | + |
| 2   | novel:chr2_7249-3p  |   | novel:chr6_12347-3p | + | novel:chr2_7720-5p  | + |
| 3   | novel:chr6_12457-3p |   | novel:chr8_14037-3p | + | novel:chr2_7249-3p  |   |
| 4   | novel:chr10_1426-5p |   | novel:chr15_4656-5p | - | novel:chr7_12896-5p |   |
| 5   | novel:chr10_1605-3p |   | novel:chr8_13987-3p | - | novel:chr1_586-5p   |   |
| 6   | novel:chr11_1960-5p |   | novel:chr10_1605-3p |   | novel:chr10_1605-3p |   |
| 7   | novel:chr11_2062-5p |   | novel:chr14_3931-3p |   | novel:chr11_2062-5p |   |
| 8   | novel:chr11_2086-5p |   | novel:chr2_7607-3p  |   | novel:chr11_2086-5p |   |
| 9   | novel:chr11_2101-3p |   | novel:chr4_10699-3p |   | novel:chr12_2936-5p |   |
| 10  | novel:chr11_2427-3p |   | novel:chr6_12797    |   | novel:chr12_3042-5p |   |
| 11  | novel:chr12_2936-5p |   | novel:chr11_2086-5p |   | novel:chr13_3366-5p |   |
| 12  | novel:chr12_3019-3p |   | novel:chr1_586-5p   |   | novel:chr15_4574-3p |   |
| 13  | novel:chr15_4656-5p |   | novel:chr10_1426-5p |   | novel:chr15_4656-5p |   |
| 14  | novel:chr15_4697-3p |   | novel:chr11_2062-5p |   | novel:chr15_4697-3p |   |
| 15  | novel:chr17_5687-3p |   | novel:chr12_3019-3p |   | novel:chr17_5687-3p |   |
| 16  | novel:chr17_5852-5p |   | novel:chr12_3042-5p |   | novel:chr17_5852-5p |   |
| 17  | novel:chr17_5857-3p |   | novel:chr13_3366-5p |   | novel:chr17_5857-3p |   |
| 18  | novel:chr19_6455-3p |   | novel:chr14_3909-3p |   | novel:chr2_7004-3p  |   |
| 19  | novel:chr19_6786-5p |   | novel:chr15_4574-3p |   | novel:chr2_7826-5p  |   |
| 20  | novel:chr2_7004-3p  |   | novel:chr15_4697-3p |   | novel:chr20_8297-3p |   |
| 21  | novel:chr2_7607-3p  |   | novel:chr16_4924-5p |   | novel:chr20_8485-3p |   |
| 22  | novel:chr2_7720-5p  |   | novel:chr2_7249-3p  |   | novel:chr21_8737-5p |   |
| 23  | novel:chr20_8297-3p |   | novel:chr2_7720-5p  |   | novel:chr21_8881-3p |   |
| 24  | novel:chr20_8485-3p |   | novel:chr4_10472-5p |   | novel:chr22_8993-3p |   |
| 25  | novel:chr21_8737-5p |   | novel:chr5_11017-3p |   | novel:chr22_9166-3p |   |
| 26  | novel:chr21_8816-5p |   | novel:chr5_11144-5p |   | novel:chr22_9170-3p |   |
| 27  | novel:chr22_8993-3p |   | novel:chr5_11212-5p |   | novel:chr3_9461-3p  |   |
| 28  | novel:chr22_9166-3p |   | novel:chr5_11251-3p |   | novel:chr4_10472-5p |   |
| 29  | novel:chr3_9461-3p  |   | novel:chr5_11540-5p |   | novel:chr4_10699-3p |   |
| 30  | novel:chr3_9508-5p  |   | novel:chr6_12250-5p |   | novel:chr5_11017-3p |   |
| 31  | novel:chr4_10472-5p |   | novel:chr6_12380-5p |   | novel:chr5_11264-5p |   |
| 32  | novel:chr4_10699-3p |   | novel:chr6_12451-3p |   | novel:chr5_11628-5p |   |
| 33  | novel:chr4_10797-3p |   | novel:chr7_12896-5p |   | novel:chr6_12250-5p |   |
| 34  | novel:chr5_11017-3p |   | novel:chr8_13981-3p |   | novel:chr6_12347-3p |   |
| 35  | novel:chr5_11264-5p |   | novel:chr9_14507-3p |   | novel:chr6_12380-5p |   |
| 36  | novel:chr5_11628-5p |   | novel:chr9_14526-5p |   | novel:chr6_12451-3p |   |
| 37  | novel:chr6_12250-5p |   | novel:chrX_15877-3p |   | novel:chr8_13987-3p |   |
| 38  | novel:chr6_12347-3p |   | novel:chr1_658-5p   |   | novel:chr8_14037-3p |   |
| 39  | novel:chr6_12451-3p |   | novel:chr6_12347-3p |   | novel:chr9_14480-5p |   |
| 40  | novel:chr7_12820-5p |   |                     |   | novel:chr9_14507-3p |   |
| 41  | novel:chr7_12877-3p |   |                     |   | novel:chr12_3019-3p |   |
| 42  | novel:chr7_12896-5p |   |                     |   | novel:chr2_7720-5p  |   |
| 43  | novel:chr8_13981-3p |   |                     |   |                     |   |
| 44  | novel:chr8_13987-3p |   |                     |   |                     |   |
| 45  | novel:chr9_14480-5p |   |                     |   |                     |   |
| 46  | novel:chr9_14507-3p |   |                     |   |                     |   |

**Table S2. The list of detected piRNAs.** The piRNAs that had significantly higher or lower abundance in PTSD+ patients were marked with + and -, respectively.

| No. | Plasma        |   | EV            |   | EVD           |   |
|-----|---------------|---|---------------|---|---------------|---|
| 1   | piR-hsa-5067  | + | piR-hsa-14870 | + | piR-hsa-29939 | + |
| 2   | piR-hsa-793   | + | piR-hsa-23533 | + | piR-hsa-1043  |   |
| 3   | piR-hsa-1043  |   | piR-hsa-23566 | + | piR-hsa-1100  |   |
| 4   | piR-hsa-1100  |   | piR-hsa-23672 | + | piR-hsa-11256 |   |
| 5   | piR-hsa-1177  |   | piR-hsa-29939 | + | piR-hsa-1177  |   |
| 6   | piR-hsa-1207  |   | piR-hsa-26925 | - | piR-hsa-1207  |   |
| 7   | piR-hsa-12454 |   | piR-hsa-1043  |   | piR-hsa-1254  |   |
| 8   | piR-hsa-12487 |   | piR-hsa-1079  |   | piR-hsa-1282  |   |
| 9   | piR-hsa-1254  |   | piR-hsa-1100  |   | piR-hsa-1359  |   |
| 10  | piR-hsa-1282  |   | piR-hsa-11256 |   | piR-hsa-20266 |   |
| 11  | piR-hsa-1359  |   | piR-hsa-1177  |   | piR-hsa-20613 |   |
| 12  | piR-hsa-14870 |   | piR-hsa-1207  |   | piR-hsa-2107  |   |
| 13  | piR-hsa-1849  |   | piR-hsa-1219  |   | piR-hsa-21126 |   |
| 14  | piR-hsa-18905 |   | piR-hsa-12454 |   | piR-hsa-22381 |   |
| 15  | piR-hsa-20266 |   | piR-hsa-12487 |   | piR-hsa-23209 |   |
| 16  | piR-hsa-20613 |   | piR-hsa-1254  |   | piR-hsa-23210 |   |
| 17  | piR-hsa-21126 |   | piR-hsa-12789 |   | piR-hsa-23248 |   |
| 18  | piR-hsa-2117  |   | piR-hsa-1282  |   | piR-hsa-23317 |   |
| 19  | piR-hsa-2154  |   | piR-hsa-1359  |   | piR-hsa-23533 |   |
| 20  | piR-hsa-22381 |   | piR-hsa-19620 |   | piR-hsa-23638 |   |
| 21  | piR-hsa-23209 |   | piR-hsa-20266 |   | piR-hsa-23672 |   |
| 22  | piR-hsa-23210 |   | piR-hsa-20613 |   | piR-hsa-23919 |   |
| 23  | piR-hsa-23248 |   | piR-hsa-2107  |   | piR-hsa-25783 |   |
| 24  | piR-hsa-23317 |   | piR-hsa-21126 |   | piR-hsa-26589 |   |
| 25  | piR-hsa-23533 |   | piR-hsa-23209 |   | piR-hsa-26681 |   |
| 26  | piR-hsa-23555 |   | piR-hsa-23210 |   | piR-hsa-26747 |   |
| 27  | piR-hsa-23566 |   | piR-hsa-23248 |   | piR-hsa-26872 |   |
| 28  | piR-hsa-23617 |   | piR-hsa-23317 |   | piR-hsa-26925 |   |
| 29  | piR-hsa-23672 |   | piR-hsa-23619 |   | piR-hsa-27140 |   |
| 30  | piR-hsa-23919 |   | piR-hsa-23638 |   | piR-hsa-27282 |   |
| 31  | piR-hsa-24672 |   | piR-hsa-23919 |   | piR-hsa-27400 |   |
| 32  | piR-hsa-25783 |   | piR-hsa-24684 |   | piR-hsa-27616 |   |
| 33  | piR-hsa-26589 |   | piR-hsa-25783 |   | piR-hsa-27622 |   |
| 34  | piR-hsa-26681 |   | piR-hsa-26508 |   | piR-hsa-27728 |   |
| 35  | piR-hsa-26747 |   | piR-hsa-26589 |   | piR-hsa-28190 |   |
| 36  | piR-hsa-26872 |   | piR-hsa-26747 |   | piR-hsa-28212 |   |
| 37  | piR-hsa-26925 |   | piR-hsa-27282 |   | piR-hsa-28223 |   |
| 38  | piR-hsa-27007 |   | piR-hsa-27400 |   | piR-hsa-28374 |   |
| 39  | piR-hsa-27282 |   | piR-hsa-27616 |   | piR-hsa-28391 |   |
| 40  | piR-hsa-27400 |   | piR-hsa-27622 |   | piR-hsa-28467 |   |
| 41  | piR-hsa-27616 |   | piR-hsa-27728 |   | piR-hsa-28478 |   |
| 42  | piR-hsa-27622 |   | piR-hsa-27731 |   | piR-hsa-28489 |   |
| 43  | piR-hsa-27728 |   | piR-hsa-28131 |   | piR-hsa-28876 |   |
| 44  | piR-hsa-27731 |   | piR-hsa-28190 |   | piR-hsa-29114 |   |
| 45  | piR-hsa-28205 |   | piR-hsa-28212 |   | piR-hsa-30715 |   |
| 46  | piR-hsa-28212 |   | piR-hsa-28223 |   | piR-hsa-5067  |   |
| 47  | piR-hsa-28223 |   | piR-hsa-28231 |   | piR-hsa-5939  |   |
| 48  | piR-hsa-28374 |   | piR-hsa-28374 |   | piR-hsa-619   |   |
| 49  | piR-hsa-28391 |   | piR-hsa-28391 |   |               |   |
| 50  | piR-hsa-28467 |   | piR-hsa-28467 |   |               |   |
| 51  | piR-hsa-28478 |   | piR-hsa-28478 |   |               |   |
| 52  | piR-hsa-28488 |   | piR-hsa-28489 |   |               |   |
| 53  | piR-hsa-28634 |   | piR-hsa-28841 |   |               |   |
| 54  | piR-hsa-28841 |   | piR-hsa-28876 |   |               |   |
| 55  | piR-hsa-29114 |   | piR-hsa-426   |   |               |   |
| 56  | piR-hsa-29939 |   | piR-hsa-5939  |   |               |   |
| 57  | piR-hsa-30715 |   | piR-hsa-619   |   |               |   |

|    |              |  |             |  |  |  |
|----|--------------|--|-------------|--|--|--|
| 58 | piR-hsa-3405 |  | piR-hsa-793 |  |  |  |
| 59 | piR-hsa-3645 |  |             |  |  |  |
| 60 | piR-hsa-5939 |  |             |  |  |  |
| 61 | piR-hsa-619  |  |             |  |  |  |

**Table S3. The list of detected snoRNAs.**

| <b>No.</b> | <b>Plasma</b> | <b>EV</b> | <b>EVD</b> |
|------------|---------------|-----------|------------|
| 1          | ACA3-2        | ACA45     | ACA45      |
| 2          | ACA33         | U3-2B     | HBI-100    |
| 3          | ACA45         |           | U26        |
| 4          | E3            |           | U3-2B      |
| 5          | HBI-100       |           | U33        |
| 6          | U19           |           | U65        |
| 7          | U22           |           | U92        |
| 8          | U26           |           |            |
| 9          | U29           |           |            |
| 10         | U3-2B         |           |            |
| 11         | U31           |           |            |
| 12         | U33           |           |            |
| 13         | U65           |           |            |
| 14         | U74           |           |            |
| 15         | U92           |           |            |
| 16         | U95           |           |            |

**Table S4. The list of GOBPs and KEGG pathways of the target genes of miR-203a-3p and miR-339-5p.** Count indicates the number of genes of the involved in the pathway targeted by the miRNA. FES indicates Fold Enrichment Score. %FES in the last column indicates the percentage of miRNAs not altered in PTSD that showed higher FES than miR-203a-3p or miR-339-5p.

| ID         | Term                                             | Count | FES by miR-203a-3p | PValue | %FES    |
|------------|--------------------------------------------------|-------|--------------------|--------|---------|
| hsa05200   | Pathways in cancer                               | 29    | 3.89               | 0.0000 | 0.9241  |
| GO:0008285 | negative regulation of cell proliferation        | 21    | 3.09               | 0.0000 | 0.3851  |
| hsa04931   | Insulin resistance                               | 11    | 5.37               | 0.0000 | 2.2333  |
| hsa05231   | Choline metabolism in cancer                     | 10    | 5.22               | 0.0001 | 1.8868  |
| hsa04728   | Dopaminergic synapse                             | 11    | 4.53               | 0.0001 | 1.4247  |
| hsa04750   | Inflammatory mediator regulation of TRP channels | 9     | 4.84               | 0.0005 | 1.1937  |
| hsa04722   | Neurotrophin signaling pathway                   | 9     | 3.96               | 0.0018 | 5.5834  |
| hsa04611   | Platelet activation                              | 9     | 3.65               | 0.0030 | 4.5822  |
| hsa04010   | MAPK signaling pathway                           | 12    | 2.48               | 0.0084 | 5.9684  |
| hsa04110   | Cell cycle                                       | 8     | 3.40               | 0.0086 | 10.3581 |
| hsa04921   | Oxytocin signaling pathway                       | 9     | 3.00               | 0.0096 | 7.8552  |
| GO:0070102 | interleukin-6-mediated signaling pathway         | 3     | 19.44              | 0.0097 | 0.6161  |
| GO:0007411 | axon guidance                                    | 8     | 2.93               | 0.0196 | 1.3477  |
| hsa04725   | Cholinergic synapse                              | 6     | 2.85               | 0.0577 | 5.6989  |
| hsa04726   | Serotonergic synapse                             | 6     | 2.85               | 0.0577 | 5.0828  |
| GO:0006749 | glutathione metabolic process                    | 4     | 4.16               | 0.0707 | 2.9650  |
| GO:0005977 | glycogen metabolic process                       | 3     | 6.03               | 0.0874 | 3.8891  |

| ID         | Term                                  | Count | FES by miR-339-5p | PValue | %FES    |
|------------|---------------------------------------|-------|-------------------|--------|---------|
| GO:0021540 | corpus callosum morphogenesis         | 3     | 77.38             | 0.0005 | 0.2695  |
| GO:0055088 | lipid homeostasis                     | 4     | 7.94              | 0.0136 | 1.8098  |
| GO:0034599 | cellular response to oxidative stress | 4     | 4.84              | 0.0494 | 3.4655  |
| hsa01100   | Metabolic pathways                    | 24    | 1.38              | 0.0830 | 2.6569  |
| hsa04142   | Lysosome                              | 5     | 2.91              | 0.0899 | 1.8868  |
| hsa04110   | Cell cycle                            | 5     | 2.84              | 0.0962 | 15.8260 |

Figure S1. The read length distribution in each sample type.

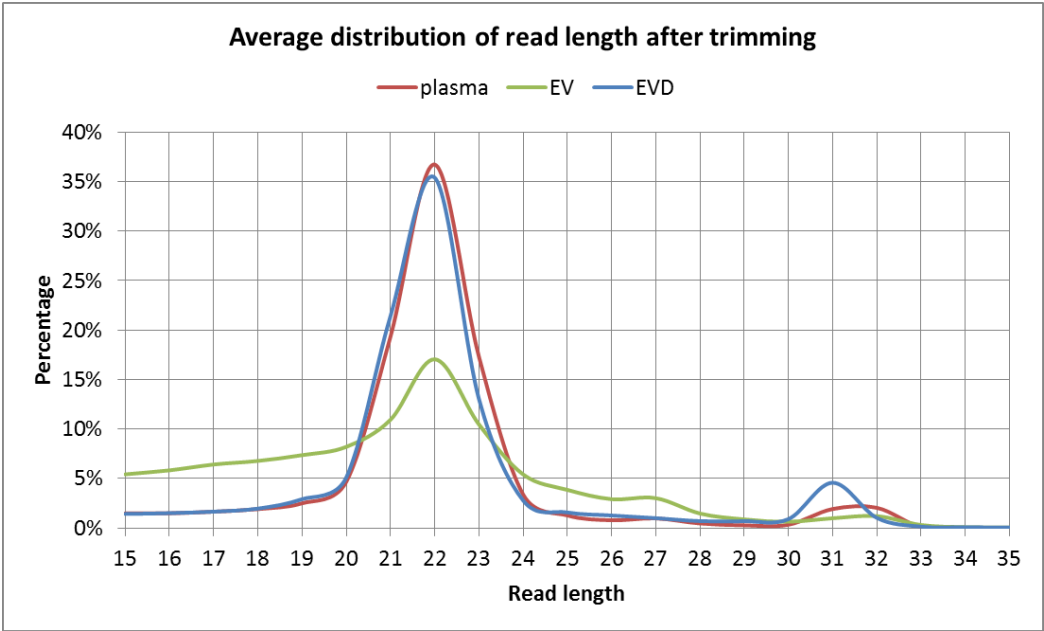

Figure S2. The distribution of mapped read length in A. plasma, B. EV, C. EVD.

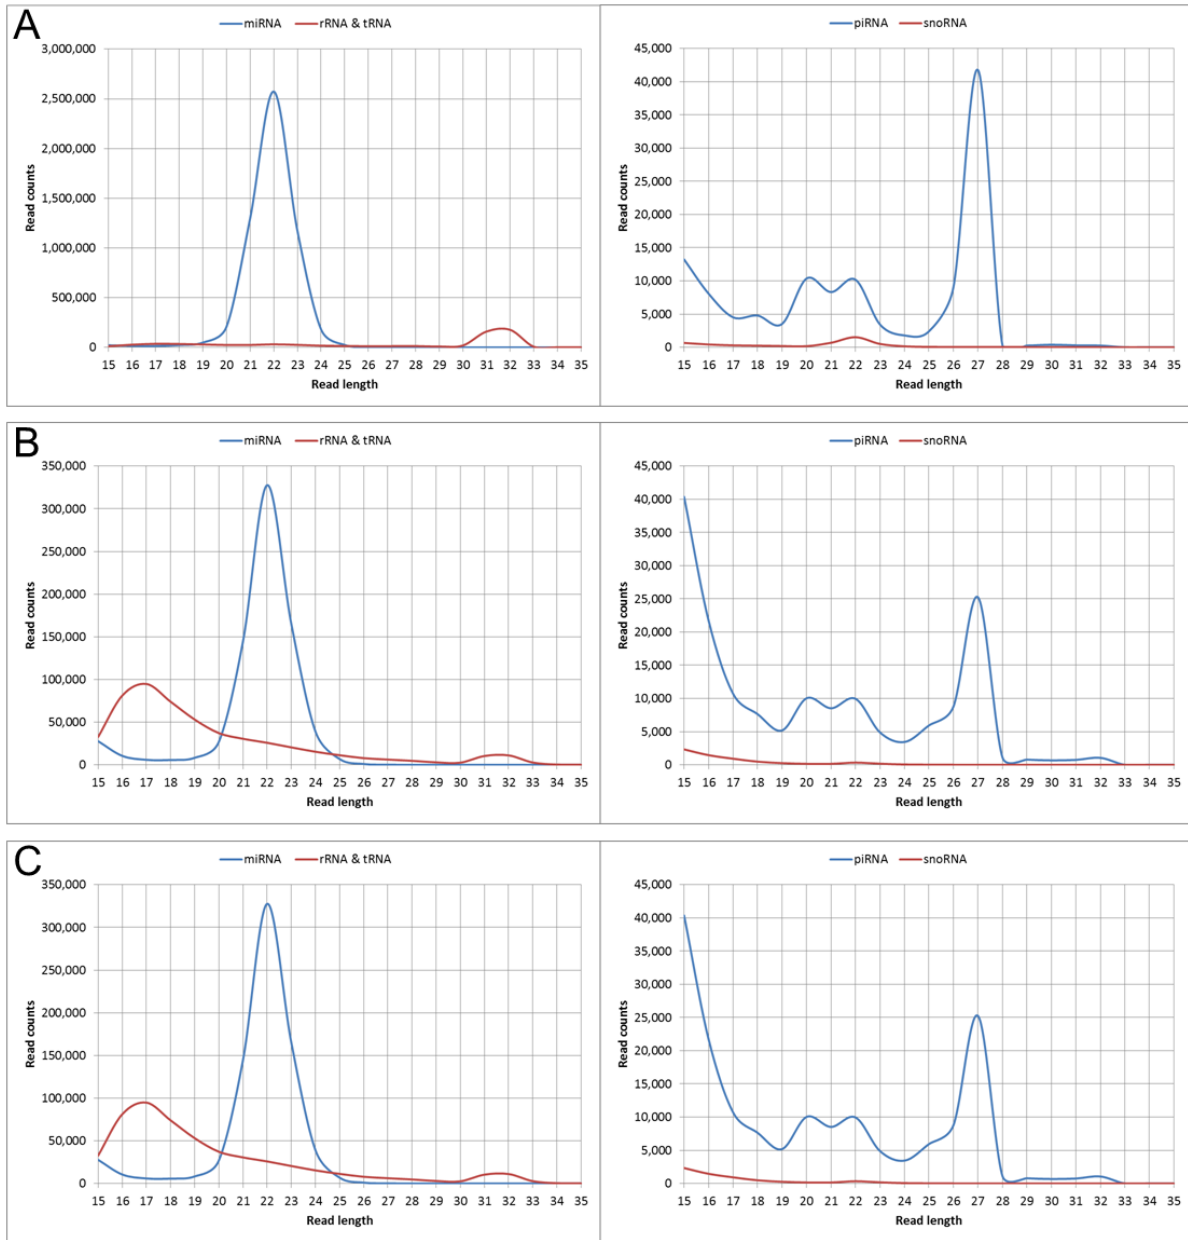



Figure S3. The number of the detected novel miRNAs in each sample type.

**A. Detected novel miRNAs**

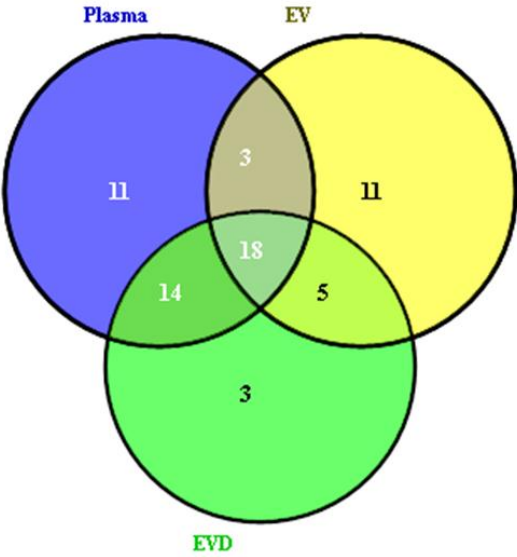

**B. Novel miRNAs affected by PTSD**

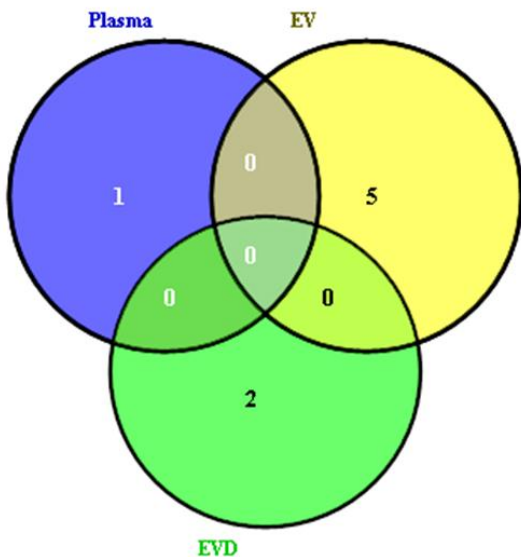

Figure S4. The number of the detected piRNAs in each sample type.

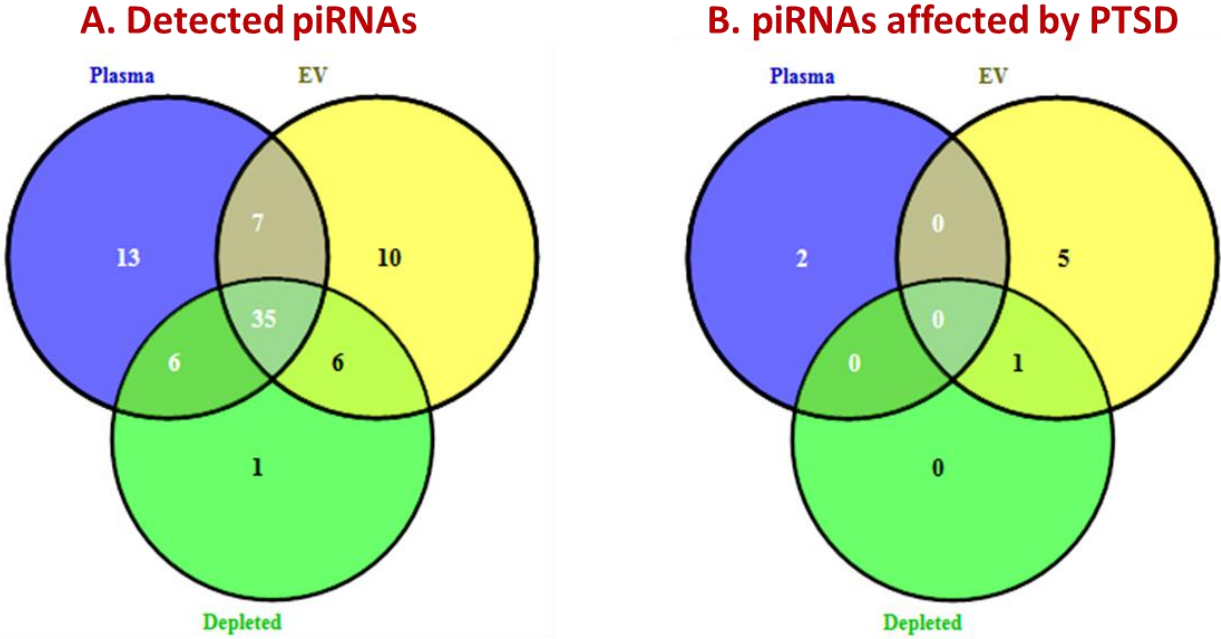

Figure S5. The number of the detected snoRNAs in each sample type.

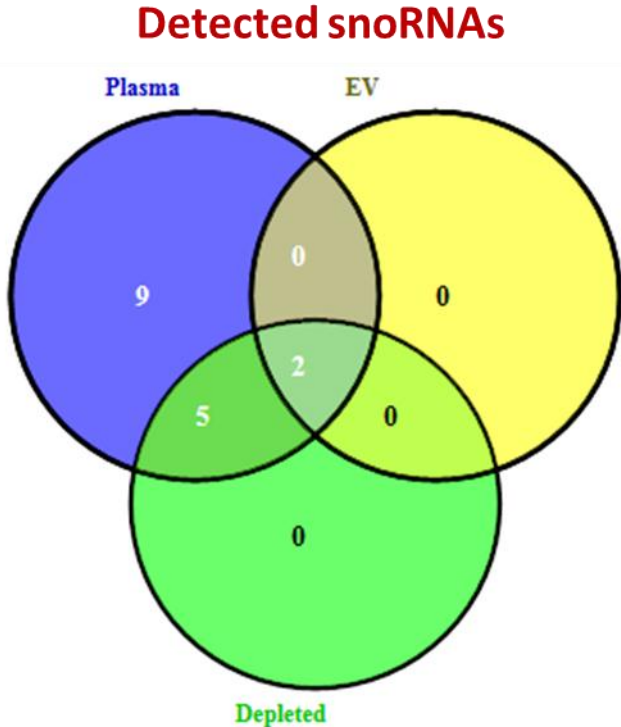

Supplement: jcm-08-00963-s001.pdf [file jcm-08-00963-s001.pdf]
